# Supplementary material for: Haplotype- and SNP-Based GWAS for Growth and Wood Quality Traits in Eucalyptus cladocalyx Trees under Arid Conditions
Source: PubMed Central journal article supplement (PMC7828368; doi:10.3390/plants10010148), 2021-01-13
Supplement: plants-10-00148-s001.pdf [file plants-10-00148-s001.pdf]

# Haplotype- and SNP-based GWAS for growth and wood quality traits in *Eucalyptus cladocalyx* trees under arid conditions

Camilo E. Valenzuela <sup>1</sup>, Paulina Ballesta <sup>2</sup>, Sunny Ahmar <sup>3</sup>, Sajid Fiaz <sup>4</sup>, Parviz Heidari <sup>5</sup>, Carlos Maldonado <sup>6</sup> and Freddy Mora-Poblete <sup>1,\*</sup>

<sup>1</sup> Institute of Biological Sciences, University of Talca, 1 Poniente 1141, Talca 3460000, Chile; [camvalenzuela@utalca.cl](mailto:camvalenzuela@utalca.cl)

<sup>2</sup> The National Fund for Scientific and Technological Development, 1201973, Av. del Agua 3895, Talca 3460000, Chile; [paballesta@gmail.com](mailto:paballesta@gmail.com)

<sup>3</sup> College of Plant Sciences and Technology Huazhong Agricultural University, Wuhan 430070, China; [sunnyahmar13@gmail.com](mailto:sunnyahmar13@gmail.com)

<sup>4</sup> Department of Plant Breeding and Genetics, The University of Haripur, Haripur 22600, Pakistan; [sfiaz@uoh.edu.pk](mailto:sfiaz@uoh.edu.pk)

<sup>5</sup> Faculty of Agriculture, Shahrood University of Technology, Shahrood 3619995161, Iran; [heidarip@shahroodut.ac.ir](mailto:heidarip@shahroodut.ac.ir)

<sup>6</sup> Instituto de Ciencias Agroalimentarias, Animales y Ambientales, Universidad de O' Higgins, San Fernando 3070000, Chile; [carlos.maldonado@uoh.cl](mailto:carlos.maldonado@uoh.cl)

\* Correspondence: [fmora@utalca.cl](mailto:fmora@utalca.cl)

Received: 19 December 2020; Accepted: 11 January 2021; Published: date

---

**Table S1.** Candidate genes associated with SNPs or haplotype blocks for the 6 traits related to growth and wood quality, assessed in adult trees of *E. cladocalyx*.

| Trait <sup>a</sup> | MTA                | Chr <sup>c</sup> | Location <sup>d</sup> | Distance <sup>e</sup> | ID <sup>f</sup>        | Gene annotation                                                               | Mutation              |
|--------------------|--------------------|------------------|-----------------------|-----------------------|------------------------|-------------------------------------------------------------------------------|-----------------------|
| HT                 | SNP112             | 1                | Upstream              | 1.12                  | Eucgr.B02728           | Major facilitator superfamily protein (MFS)                                   | -                     |
|                    | SNP3721            | 7                | Exon                  | 0.20                  | Eucgr.G02044           | Magnesium protoporphyrin ix methyltransferase (CHLM)                          | Missense <sup>h</sup> |
|                    | SNP901             | 2                | Intron                | 1.34                  | Eucgr.B02601           | Lipoyltransferase 2 (LPT2)                                                    | Silent                |
|                    | SNP2690            | 5                | Downstream            | 2.72                  | Eucgr.E00620           | Phosphoglycerate dehydrogenase 3 (PGDH3)                                      | -                     |
| DBH                | SNP112             | 1                | Upstream              | 1.12                  | Eucgr.B02728           | Major facilitator superfamily protein (MFS)                                   | -                     |
| SLD                | SNP2880            | 6                | Exon                  | 1.50                  | Eucgr.F00721           | Rnase three-like protein 2 (RT2)                                              | Missense <sup>h</sup> |
|                    |                    |                  |                       |                       |                        | Double-stranded RNA binding motif <sup>g</sup>                                |                       |
|                    | SNP5245            | 10               | Exon                  | 1.03                  | Eucgr.J02998           | Receptor like protein 54 (RLP54)                                              | Missense <sup>h</sup> |
|                    | SNP1146            | 3                | Upstream              | 1.30                  | Eucgr.C00778           | Beta-ketoacyl- <i>acp</i> synthetase 2 (KASII)                                | -                     |
|                    | SNP2976            | 6                | Upstream              | 1.22                  | Eucgr.F01050           | S-locus lectin protein kinase                                                 | -                     |
| SNP3215            | 6                  | Upstream         | 1.34                  | Eucgr.F02674          | Laccase-like 15 (TT10) | -                                                                             |                       |
| BHT                | SNP4880            | 9                | Downstream            | 0.93                  | Eucgr.I01832.1         | Xyloglucan O-acetyltransferase (TBL)                                          | -                     |
|                    | SNP4591            | 8                | Upstream              | 3.35                  | Eucgr.H04806           | Nuclear localized protein, Unknown                                            | -                     |
|                    | C7HB2 <sup>b</sup> | 7                | Exon                  | 0.75                  | Eucgr.G00060           | Methionine S-methyltransferase (MMT)                                          | Missense <sup>h</sup> |
| STR                | SNP3832            | 7                | Downstream            | 3.46                  | Eucgr.G03051           | Leucine-rich repeat protein kinase family protein                             | -                     |
|                    | SNP4141            | 8                | Upstream              | 3.48                  | Eucgr.H02411           | Cinnamyl-alcohol dehydrogenase 8 (CAD8)                                       | -                     |
|                    | SNP1382            | 3                | Exon                  | 1.07                  | Eucgr.C01907           | Gem-related 5 (GER5)                                                          | Missense <sup>h</sup> |
| PIL                | SNP4981            | 9                | Intron                | 0.80                  | Eucgr.I02798           | LSM motif, RRM_1 domain                                                       | Missense <sup>h</sup> |
|                    | SNP3906            | 8                | Intron                | 2.37                  | Eucgr.H00774           | Fatty acyl-ACP thioesterase A (FATA)                                          | Missense <sup>h</sup> |
|                    | SNP3991            | 8                | Downstream            | 0.78                  | Eucgr.H01244           | Coniferyl-alcohol glucosyltransferase /UDP-Glucosyl transferase 72E1 (UGT72E) | -                     |
|                    | SNP3995            | 8                | Upstream              | 1.47                  | Eucgr.H01620           | Serine carboxypeptidase-LIKE 20-RELATED                                       | -                     |

<sup>a</sup> HT, DBH, SLD, BHT, STR and PIL correspond to the total tree height, diameter at breast height, slenderness coefficient, 1st bifurcation height, stem straightness and pilodyn penetration, respectively. <sup>b</sup> Haplotype block; <sup>c</sup> Chromosome; <sup>d</sup> MTA location with respect to gene; <sup>e</sup> Physical distance

between MTA and candidate gene; <sup>f</sup> Transcript name in Phytozome and EucGenIE databases; <sup>g</sup> Additional sequence variants in the candidate genes;  
<sup>h</sup> Conservative or non-Conservative missense mutation.
